# Supplementary material for: Glycosylation profiles of epitope-specific anti-β-amyloid antibodies revealed by liquid chromatography–mass spectrometry
Source: Oxford University Press journal article supplement (doi:10.1093/glycob/cwp038), 2009-03-24
Supplement: cwp038_Supplementary_Data.zip [file cwp038_Supplementary_Data.zip]

Archive with 1 entries (1 files):
- cwp038_suppl_data.pdf
