# Supplementary material for: Glycosylation profiles of epitope-specific anti-β-amyloid antibodies revealed by liquid chromatography–mass spectrometry
Source: Oxford University Press journal article supplement (doi:10.1093/glycob/cwp038), 2009-03-24

**Supplementary figure:** MS/MS spectrum of the precursor ion of  $m/z$  929.69 (4+), obtained in the data dependent mode with a collision energy ramp from 30 to 40 V, which was assigned to the miss-cleaved glycopeptide TKPREEQFNSTYR containing the glycan G<sub>2</sub>FSA. The ions marked with a star are singly charged. The other ions observed in the MS/MS are doubly charged, and the indicated masses are monoisotopic.

# MS/MS m/z 929.69 (4+)

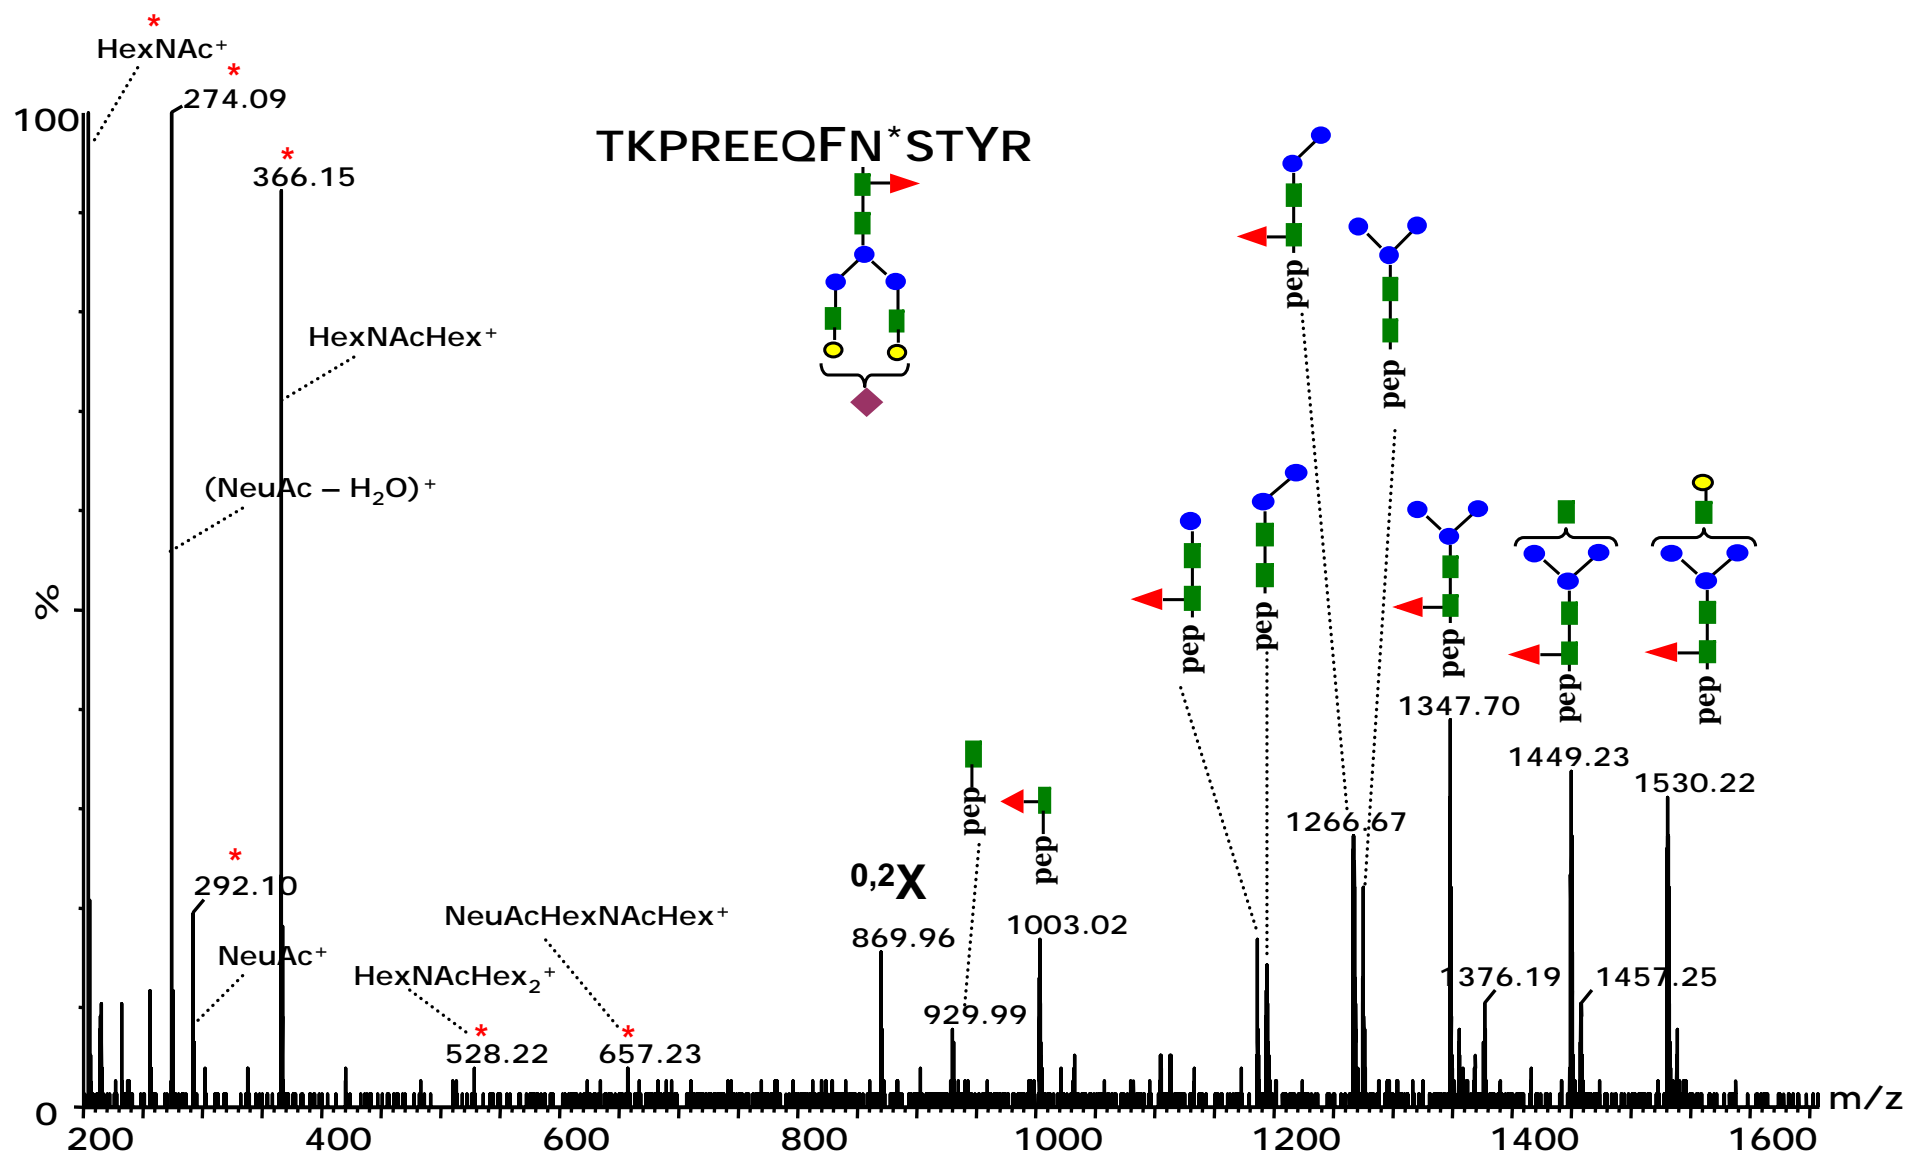

Supplement: cwp038_Supplementary_Data.zip [file cwp038_Supplementary_Data.zip › cwp038_suppl_data.pdf]
